# Supplementary material
Source: MDPI journal article supplement (https://www.mdpi.com/2079-6412/11/2/226)
Supplement: s1 [file s1]

*Supplementary Materials:*

# Comparison of the Technical Performance of Leather, Artificial Leather, and Trendy Alternatives

Michael Meyer \*, Sascha Dietrich, Haiko Schulz and Anke Mondschein

FILK Freiberg Institute gGmbH, Meißner Ring 1, 09599 Freiberg, Germany;  
sascha.dietrich@filkfreiberg.de (S.D.); haiko.schulz@filkfreiberg.de (H.S.);  
anke.mondschein@filkfreiberg.de (A.M.)

\* Correspondence: michael.meyer@filkfreiberg.de

Microscopic pictures of all investigated samples; cross sections and surfaces; 50-time magnification.

**Citation:** Meyer, M.; Dietrich, S.; Schulz, H.; Mondschein, A. Comparison of the Technical Performance of Leather, Artificial Leather and Trendy Alternatives. *2021*, *11*, 226. <https://doi.org/10.3390/coatings11020226>

Received: 25 January 2021

Accepted: 11 February 2021

Published: 13 February 2021

**Publisher's Note:** MDPI stays neutral with regard to jurisdictional claims in published maps and institutional affiliations.

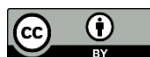

**Copyright:** © 2021 by the authors. Licensee MDPI, Basel, Switzerland. This article is an open access article distributed under the terms and conditions of the Creative Commons Attribution (CC BY) license (<http://creativecommons.org/licenses/by/4.0/>).

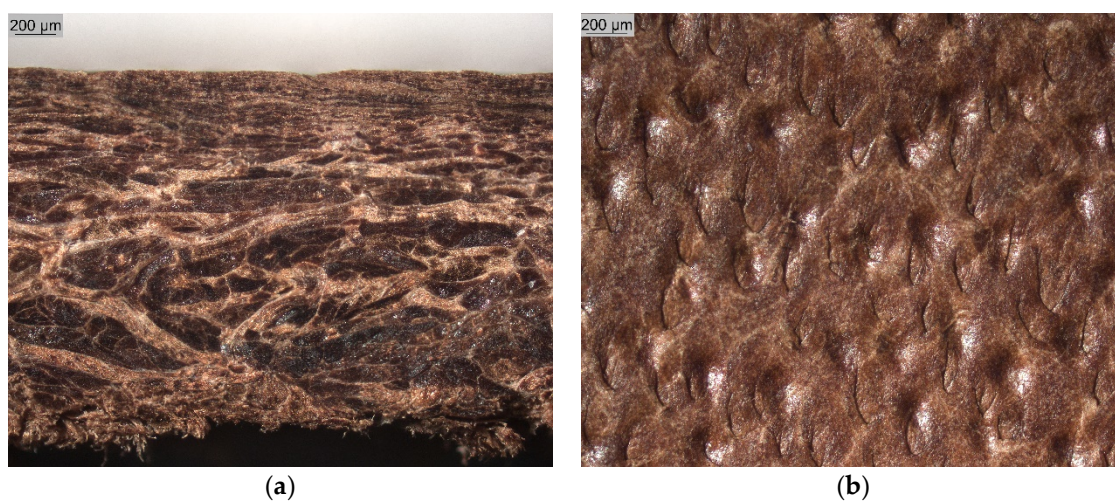

**Figure S1.** Sample Shoe upper leather; (a) cross section, (b) surface.

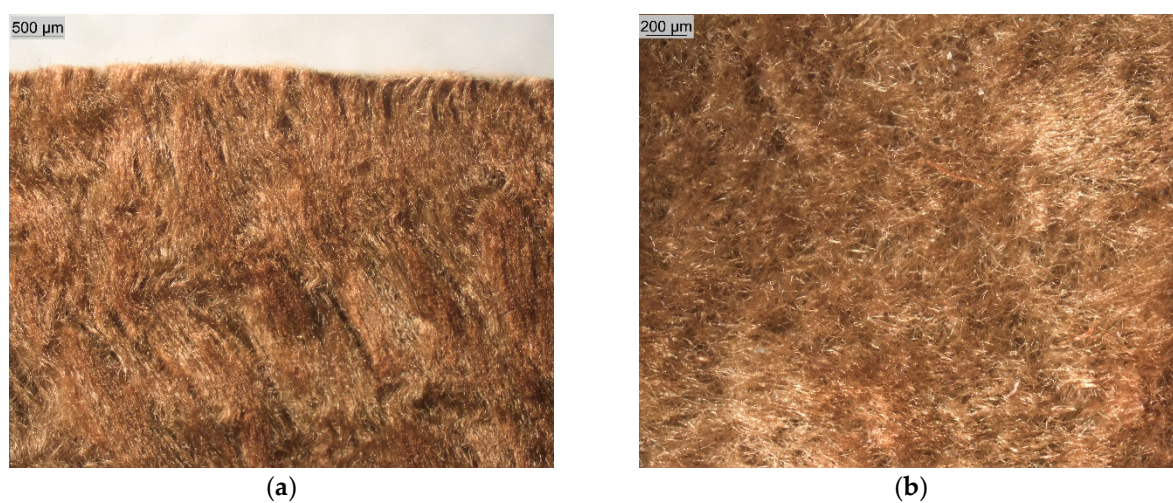

**Figure S2.** Sample Muskin®; (a) cross section (25 times magnification), (b) surface.

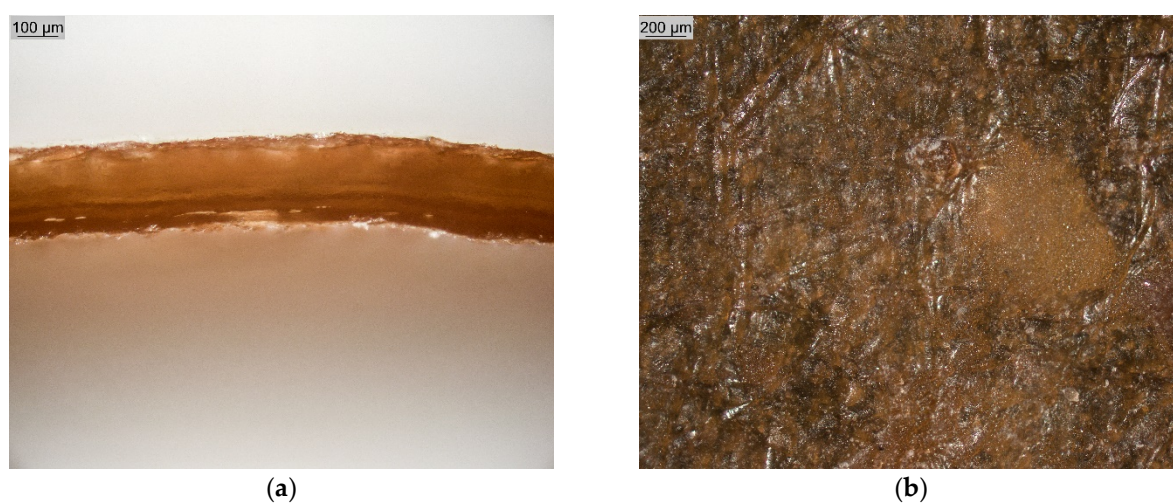

**Figure S3.** Sample Kombucha; (a) cross section (100 times magnification), (b) surface.



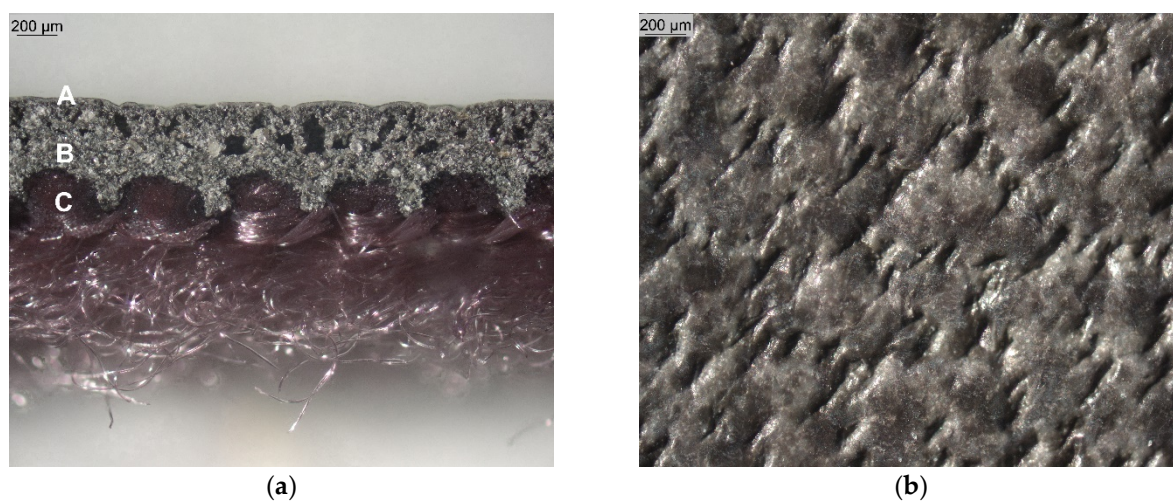

**Figure S4.** Sample PUR-coated textile; (a) cross section, A: thin compact top layer, B: foamed layer, C: textile carrier, (b) surface.

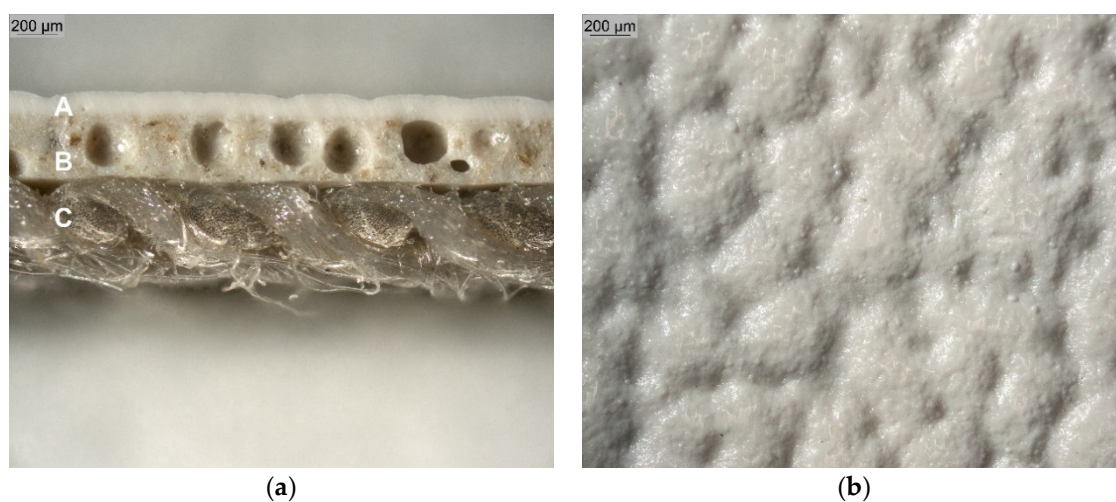

**Figure S5.** Sample Desserto®; (a) cross section, A: compact top layer, B: foamed layer, C: textile carrier, (b) surface.

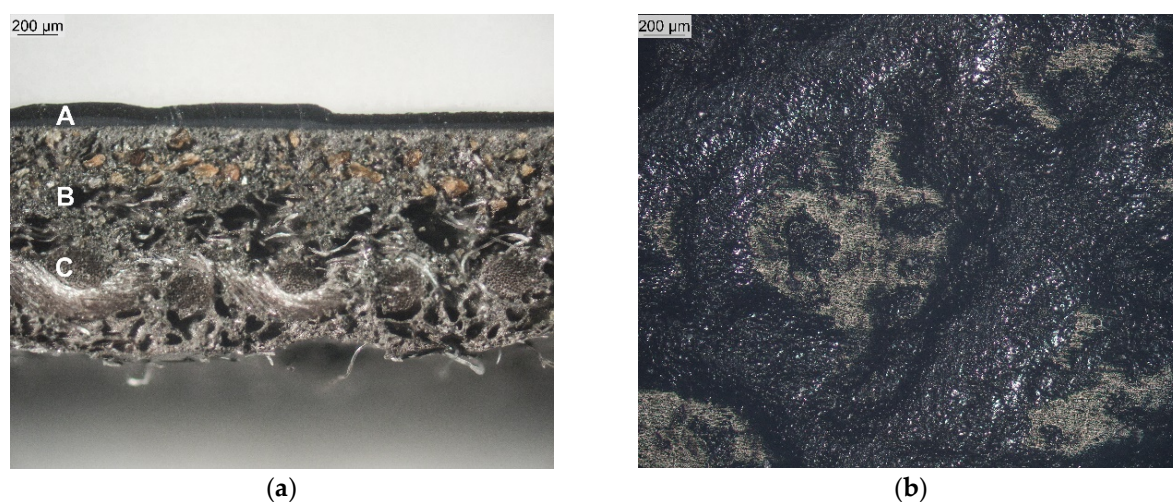

**Figure S6.** Sample AppleSkin®; (a) cross section, A: compact top layers, B: foamed layer, C: impregnated layer with a textile carrier, (b) surface.



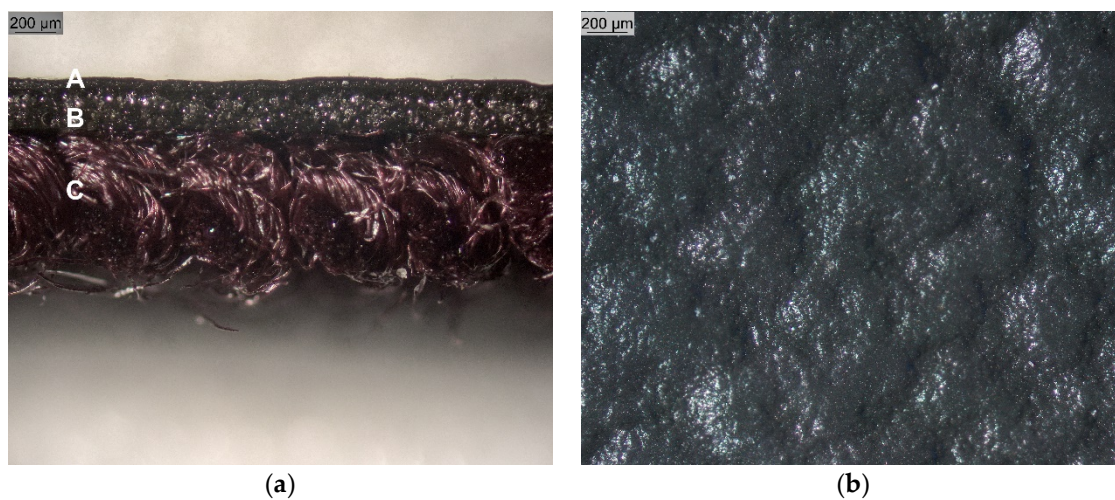

**Figure S7.** Sample Vegea®; (a) cross section, A: compact top layer, B: foamed layer, C: textile carrier (b) surface.

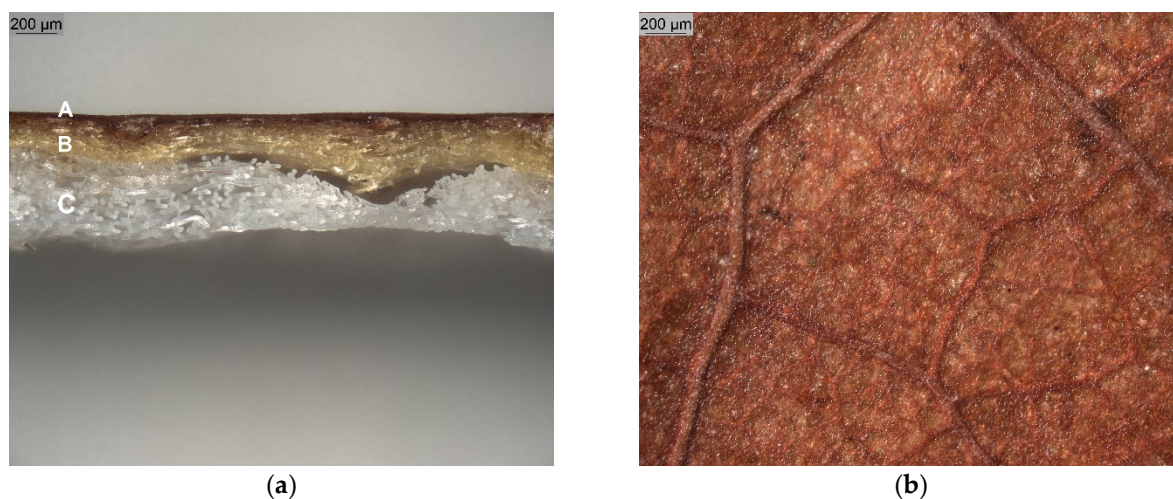

**Figure S8.** Sample Teak leaf®; (a) cross section, A: leaf with a transparent top layer, B: textile layer 1, C: textile layer 2, (b) surface.

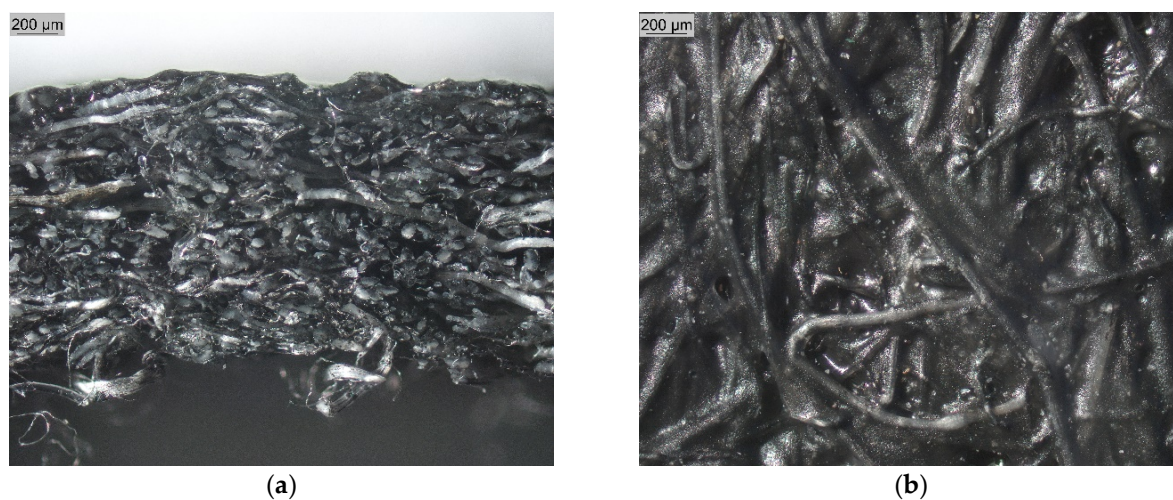

**Figure S9.** Sample Pinatex®; (a) cross section, non-woven with compact top layer, (b) surface.



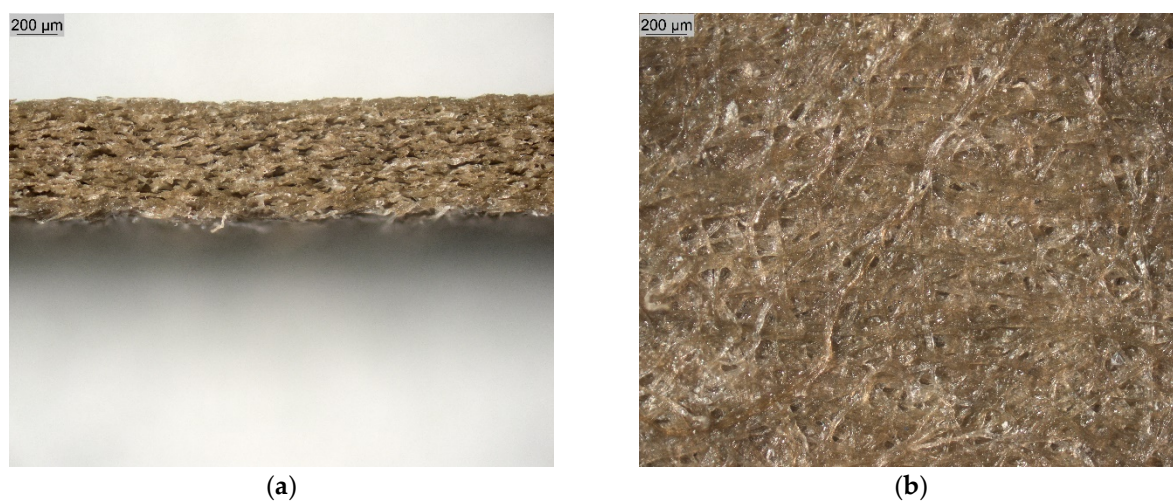

**Figure S10.** Sample SnapPap®; (a) cross section, (b) surface.

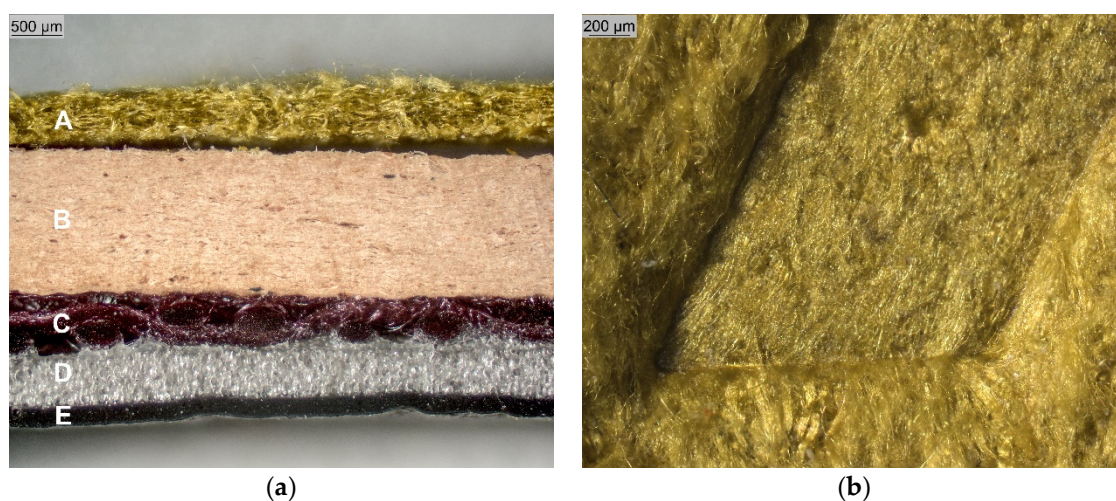

**Figure S11.** Sample Noani®; (a) cross section (25 times magnification), A: microfibre layer, B: leather board layer, C: textile carrier, D: foamed layer, E: compact layer, (b) surface, embossed region.

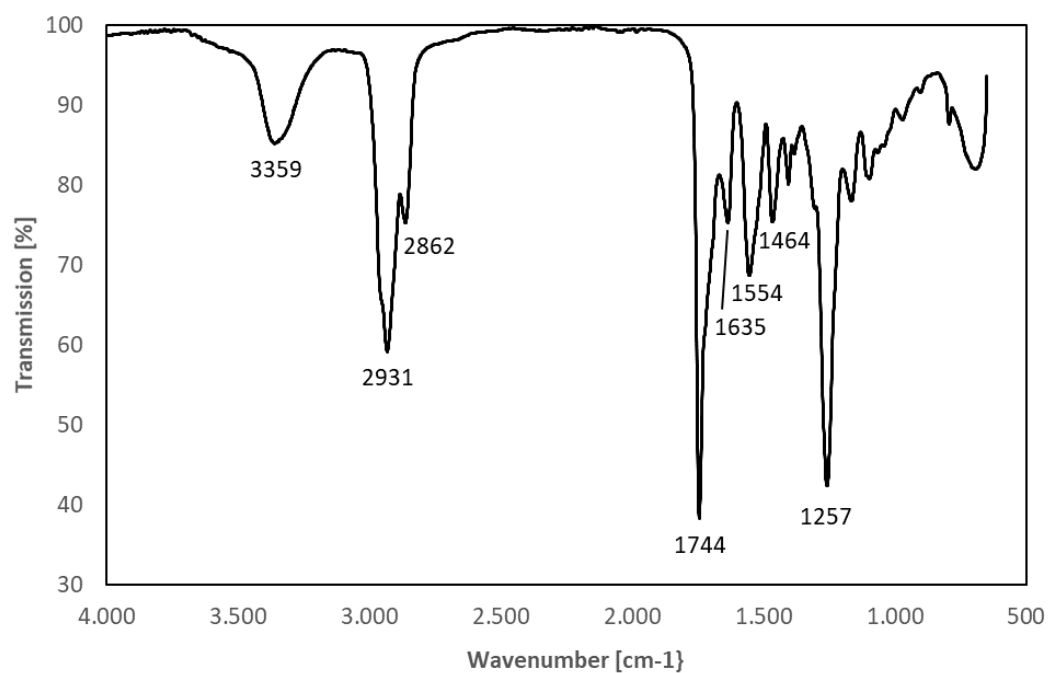

**Figure S12.** FTIR spectrum of Desserto® as an example of a PUR-coated material with typical molecular vibrations (3359 NH; 2931 CH<sub>2</sub>; 2862 CH<sub>2</sub>; 1744 C=O; 1635 O=C-NH; 1554 Amid; 1464 CH<sub>2</sub>; 1257 C-O-C).
